# Supplementary material for: A Systematic Review of Worldwide Consumption of Ultra-Processed Foods: Findings and Criticisms
Source: MDPI journal article supplement (doi:10.3390/nu13082778), 2021-08-13
Supplement: s1 [file s1]

Supplementary Table 1 –Level of consumption of ultra-processed foods (UPF) expressed as % energy provided by UPF intake with respect to total energy intake (TEI) in pregnant women and following different dietary patterns

| Author<br>(year)                              | Country | Study population                                                                                                                                      | UPF consumption and statistics                                                                                                                                                                                                                                                                                                                                                                                                    |
|-----------------------------------------------|---------|-------------------------------------------------------------------------------------------------------------------------------------------------------|-----------------------------------------------------------------------------------------------------------------------------------------------------------------------------------------------------------------------------------------------------------------------------------------------------------------------------------------------------------------------------------------------------------------------------------|
| <b>PREGNANTS</b>                              |         |                                                                                                                                                       |                                                                                                                                                                                                                                                                                                                                                                                                                                   |
| Silva et al.,<br>(2021)<br>[37]               | Brazil  | n = 42 pregnant women with pregestational diabetes mellitus (100% F)<br><br>(mean age 31.5 ± 5.8 y; mean BMI: nd)                                     | Second trimester = 16.9 ± 7.7% of TEI<br>Third trimester = 15.2 ± 10% of TEI<br>No difference between trimesters                                                                                                                                                                                                                                                                                                                  |
| Gomes et al.<br>(2019)<br>[34]                | Brazil  | n = 353 pregnant women (100% F)<br><br>(mean age: nd; mean BMI: nd)                                                                                   | First trimester = 23.9% vs. 26% of TEI (intervention group vs control group, respectively)<br>No difference between group<br>Second trimester = 20.6% vs 27.3% of TEI (intervention group vs control group, respectively)<br>Significantly different (p<0.001) between groups<br>Third trimester = 22.8% vs. 26.7% of TEI (intervention group vs control group, respectively)<br>Significantly different (p=0.022) between groups |
|                                               |         |                                                                                                                                                       | SD or SEM nor reported                                                                                                                                                                                                                                                                                                                                                                                                            |
| <b>DIETARY PATTERNS</b>                       |         |                                                                                                                                                       |                                                                                                                                                                                                                                                                                                                                                                                                                                   |
| Gehring et al.,<br>(2020 and 2021)<br>[64,65] | France  | n = 21212 subjects (73.1% F)<br>(mean age 56.3 ± 13.8 y; mean BMI: nd)<br>19812 meat eaters<br>646 pesco-vegetarians<br>500 vegetarians<br>254 vegans | Meat eaters = 33% of TEI<br>Pesco-vegetarians = 32.5% of TEI<br>Vegetarians = 37% of TEI<br>Vegans = 39.5% of TEI<br>SD or SEM not reported.<br>Significantly (p<0.001) higher in vegetarian and vegans compared to the other dietary patterns                                                                                                                                                                                    |

Data are reported as mean ± standard deviation (SD) or standard error of the mean (SEM)\*

CI, confidence interval; BMI: body mass index; ND, not determined; UPF, ultra-processed food and drink products; y: year; TEI, total energy intake
